# Supplementary material for: Targeting Ephrin Receptor Tyrosine Kinase A2 with a Selective Aptamer for Glioblastoma Stem Cells
Source: PubMed Central journal article supplement — Mol Ther Nucleic Acids. 2020 Feb 13;20:176–85. doi: 10.1016/j.omtn.2020.02.005 (PMC7068199; doi:10.1016/j.omtn.2020.02.005), 2020-02-13

## **Supplemental Information**

### **Targeting Ephrin Receptor Tyrosine Kinase A2**

#### **with a Selective Aptamer for Glioblastoma**

#### **Stem Cells**

**Alessandra Affinito, Cristina Quintavalle, Carla Lucia Esposito, Giuseppina Roscigno, Catello Giordano, Silvia Nuzzo, Lucia Ricci-Vitiani, Iolanda Scognamiglio, Zoran Minic, Roberto Pallini, Maxim V. Berezovski, Vittorio de Francis, and Gerolama Condorelli**

### **Supplementary Figure Legends**

**Figure S1. A40s effects on GBM stem and differentiated cells.** A40s reduces both GBM stem cell viability and migration (**A-B**) but does not affect migratory ability (**C**) and viability (**D**) of differentiated GBM cells. Representative experiments are shown and results are expressed in relation to the background effect detected by using scrambled sequence. Vertical bars indicate standard deviation values. ns indicates not significance values.

A

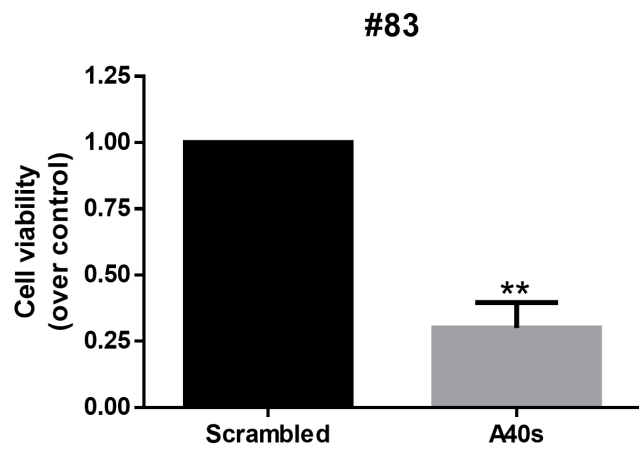

B

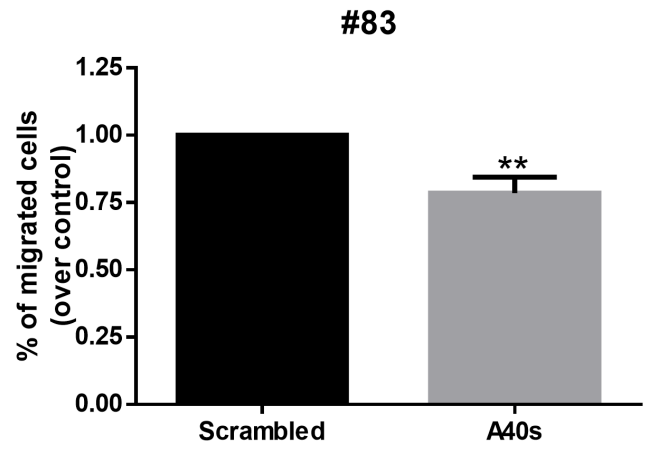

C

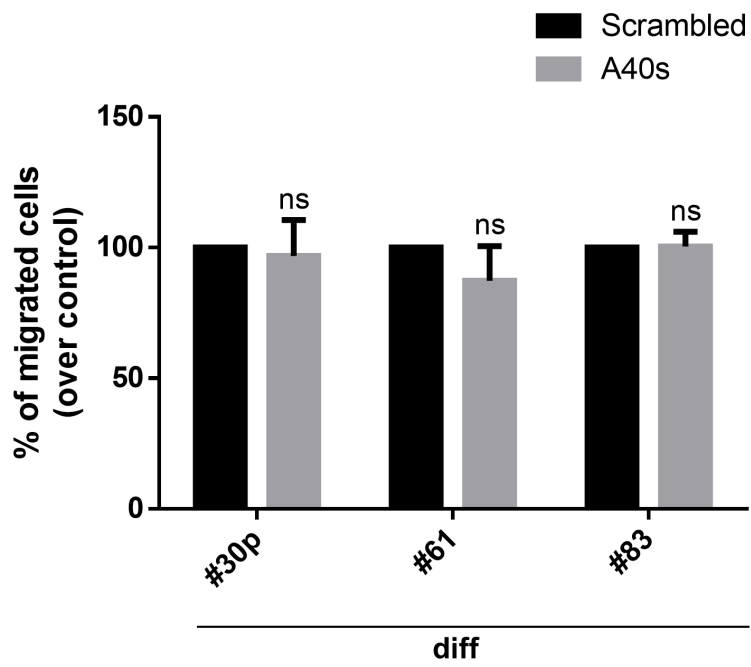

D

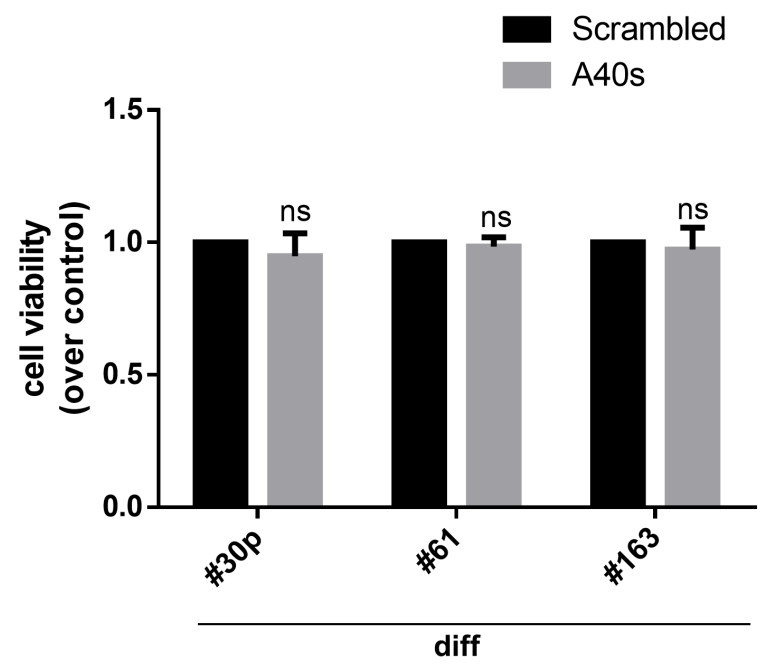

Supplement: mmc1.pdf [file mmc1.pdf]
